# Supplementary material
Source: publisher site journal article supplement (https://www.dovepress.com/article/326898)
Supplement: Supplementary file 1 [file get_supplementary_file.php]

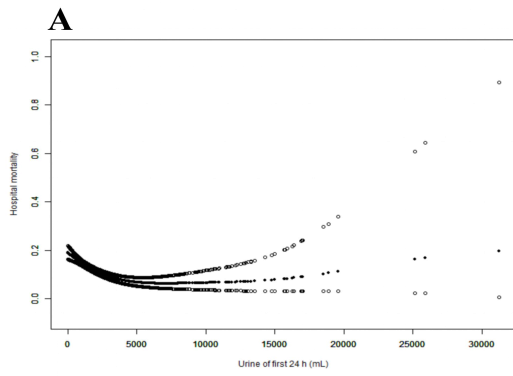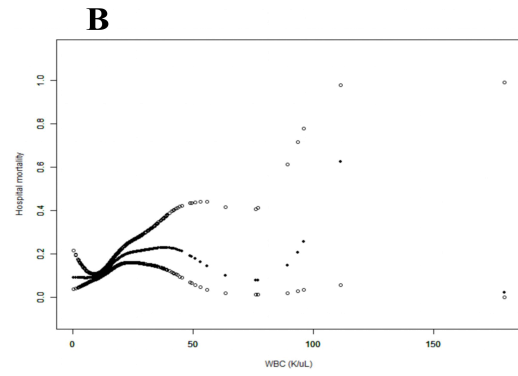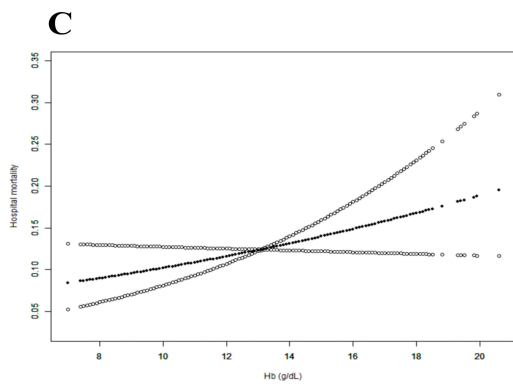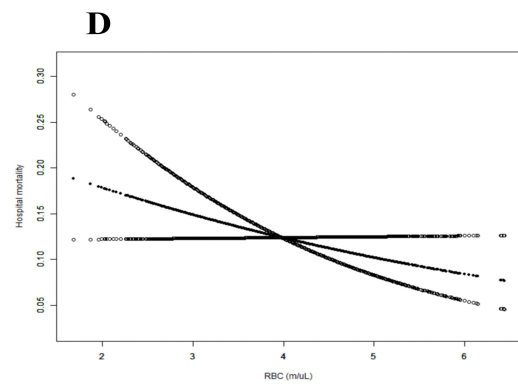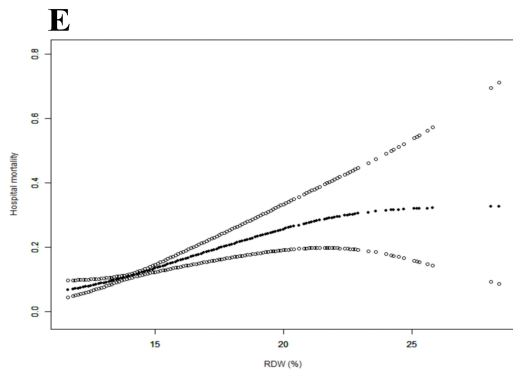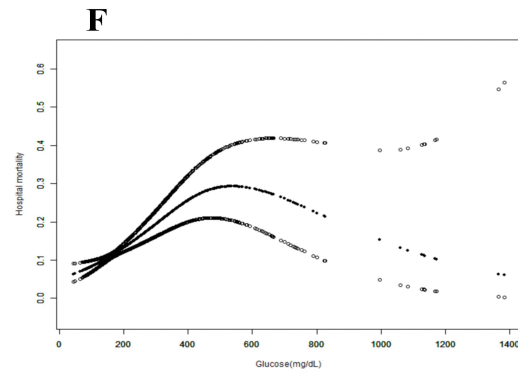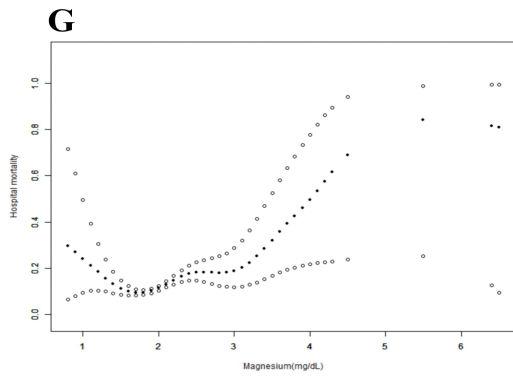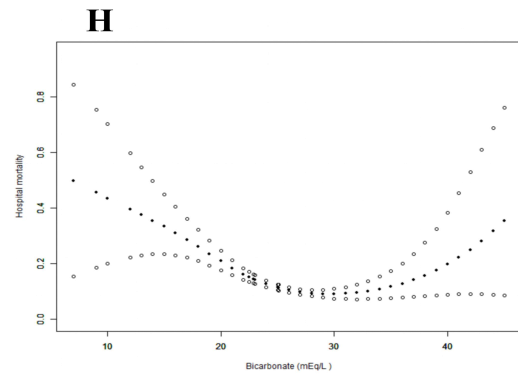

**Supplemental figure 1:** Smooth curve fitting of significant continuous variables and hospital mortality. All adjustment variables: gender, age, ethnicity, hypertension, diabetes, heart failure, peripheral vascular disease, prior myocardial infarction, hypercholesterolemia, atrial fibrillation, cardiac arrest, cardiogenic shock, valvular disease, SBP, MBP and DBP, use of norepinephrine, dopamine, epinephrine, urine output TnT, CKMB, WBC, RBC, PLT, Hb, RDW, serum levels of glucose, BUN, creatinine, Na<sup>+</sup>, K<sup>+</sup>, HCO<sub>3</sub><sup>+</sup>, Mg<sup>+</sup>. A: smooth curve fitting of urine of the first 24 h; The cut-off value was 3725ml; B: smooth curve fitting of WBC; The cut-off value was 23.63 K/uL; C: smooth curve fitting of Hb; D: smooth curve fitting of RBC; E: smooth curve fitting of RDW; F: smooth curve fitting of serum glucose; The cut-off value was 403mg/dL;G: smooth curve fitting of serum magnesium; The cut-off value was 1.8mg/dl; H: smooth curve fitting of bicarbonate; The cut-off value was 27 mEq/L.

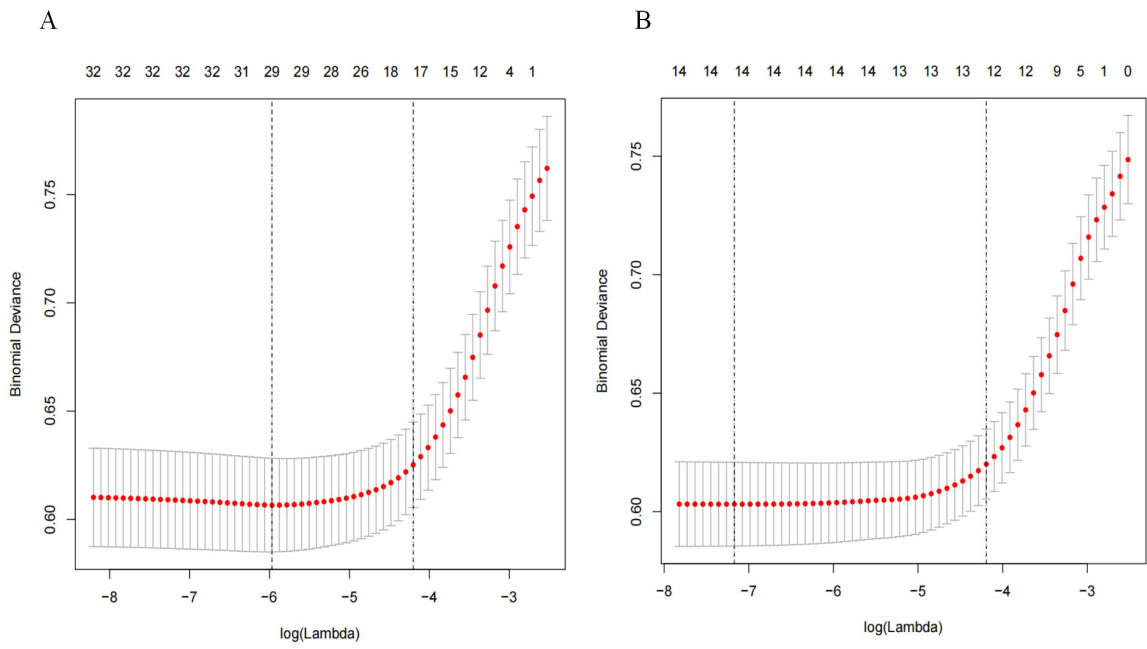

**Supplemental figure 2:** Predictors' selection using the least absolute shrinkage and selection operator (LASSO) regression method. A 10-fold cross-validation was used in the LASSO regression. A: LASSO regression conduct to all characteristics variables B: LASSO regression conduct to 14 variables selected from multivariate logistic regression.
